# Supplementary material for: miR-142 orchestrates a network of actin cytoskeleton regulators during megakaryopoiesis
Source: eLife. 2014 May 23;3:e01964. doi: 10.7554/eLife.01964 (PMC4067751; doi:10.7554/eLife.01964)
Supplement: Figure 1—source data 1. — Genotypes of E14.5 and P21 offspring from miR-142+/− intercrosses reveals partial perinatal or juvenile lethality in miR-142−/− mice. The actual and expected number of mice for each genotype at the indicated stages is shown. DOI: http://dx.doi.org/10.7554/eLife.01964.004 [file elife01964s001.xlsx]

## Sheet: Sheet1
				Genotypes of offsprings from miR-142+/– intercrosses
				Age	n		miR-142+/+	miR-142+/–	miR-142–/–
				E14	164	Observed	46 (28%)	78 (48%)	40 (24%)
						Expected	41 (25%)	82 (50%)	41 (25%)
				P21	269	Observed	83 (31%)	136 (51%)	50 (18%)
						Expected	67 (25%)	135 (50%)	67 (25%)
