# Supplementary material for: miR-142 orchestrates a network of actin cytoskeleton regulators during megakaryopoiesis
Source: eLife. 2014 May 23;3:e01964. doi: 10.7554/eLife.01964 (PMC4067751; doi:10.7554/eLife.01964)
Supplement: Figure 5—source data 1. — DOI: http://dx.doi.org/10.7554/eLife.01964.013 [file elife01964s002.xlsx]

## Sheet: Upreg
GO Term ID	Category	GO Term	PValue
GO:0006955	GOTERM_BP_FAT	immune response	0.000323719
GO:0044092	GOTERM_BP_FAT	negative regulation of molecular function	0.000703609
GO:0006873	GOTERM_BP_FAT	cellular ion homeostasis	0.00103068
GO:0055082	GOTERM_BP_FAT	cellular chemical homeostasis	0.00130265
GO:0005886	GOTERM_CC_FAT	plasma membrane	0.00146846
GO:0019725	GOTERM_BP_FAT	cellular homeostasis	0.00164267
GO:0042592	GOTERM_BP_FAT	homeostatic process	0.00232935
GO:0012506	GOTERM_CC_FAT	vesicle membrane	0.00252359
GO:0050801	GOTERM_BP_FAT	ion homeostasis	0.00289398
GO:0048878	GOTERM_BP_FAT	chemical homeostasis	0.00300368
GO:0001730	GOTERM_MF_FAT	2'-5'-oligoadenylate synthetase activity	0.00431344
GO:0001568	GOTERM_BP_FAT	blood vessel development	0.00537784
GO:0030659	GOTERM_CC_FAT	cytoplasmic vesicle membrane	0.00632143
GO:0009719	GOTERM_BP_FAT	response to endogenous stimulus	0.00635144
GO:0001944	GOTERM_BP_FAT	vasculature development	0.00646286
GO:0016265	GOTERM_BP_FAT	death	0.00658762
GO:0005764	GOTERM_CC_FAT	lysosome	0.00679695
GO:0000323	GOTERM_CC_FAT	lytic vacuole	0.00704229
GO:0016791	GOTERM_MF_FAT	phosphatase activity	0.00790844
GO:0005525	GOTERM_MF_FAT	GTP binding	0.00908688
GO:0044433	GOTERM_CC_FAT	cytoplasmic vesicle part	0.00960021
GO:0009986	GOTERM_CC_FAT	cell surface	0.0100487
GO:0009725	GOTERM_BP_FAT	response to hormone stimulus	0.0102415
GO:0019001	GOTERM_MF_FAT	guanyl nucleotide binding	0.011052
GO:0032561	GOTERM_MF_FAT	guanyl ribonucleotide binding	0.011052
GO:0048514	GOTERM_BP_FAT	blood vessel morphogenesis	0.0111097
GO:0043392	GOTERM_BP_FAT	negative regulation of DNA binding	0.0117099
GO:0008219	GOTERM_BP_FAT	cell death	0.0117574
GO:0007155	GOTERM_BP_FAT	cell adhesion	0.0145339
GO:0022610	GOTERM_BP_FAT	biological adhesion	0.0145339
GO:0031012	GOTERM_CC_FAT	extracellular matrix	0.0148789
GO:0005201	GOTERM_MF_FAT	extracellular matrix structural constituent	0.0149127
GO:0005773	GOTERM_CC_FAT	vacuole	0.0157979
GO:0034097	GOTERM_BP_FAT	response to cytokine stimulus	0.015807
GO:0044421	GOTERM_CC_FAT	extracellular region part	0.0170412
GO:0051100	GOTERM_BP_FAT	negative regulation of binding	0.0173295
GO:0015082	GOTERM_MF_FAT	di-, tri-valent inorganic cation transmembrane transporter activity	0.0177632
GO:0048584	GOTERM_BP_FAT	positive regulation of response to stimulus	0.0188955
GO:0010033	GOTERM_BP_FAT	response to organic substance	0.0206923
GO:0030003	GOTERM_BP_FAT	cellular cation homeostasis	0.0209863
GO:0007264	GOTERM_BP_FAT	small GTPase mediated signal transduction	0.0212488
GO:0005768	GOTERM_CC_FAT	endosome	0.0232553
GO:0005578	GOTERM_CC_FAT	proteinaceous extracellular matrix	0.0260292
GO:0043434	GOTERM_BP_FAT	response to peptide hormone stimulus	0.0284753
GO:0010941	GOTERM_BP_FAT	regulation of cell death	0.0295113
GO:0048705	GOTERM_BP_FAT	skeletal system morphogenesis	0.0299346
GO:0051338	GOTERM_BP_FAT	regulation of transferase activity	0.0302404
GO:0048661	GOTERM_BP_FAT	positive regulation of smooth muscle cell proliferation	0.0302477
GO:0009897	GOTERM_CC_FAT	external side of plasma membrane	0.0304496
GO:0005829	GOTERM_CC_FAT	cytosol	0.0320077
GO:0019318	GOTERM_BP_FAT	hexose metabolic process	0.035862
GO:0001525	GOTERM_BP_FAT	angiogenesis	0.0363154
GO:0043086	GOTERM_BP_FAT	negative regulation of catalytic activity	0.0372621
GO:0006875	GOTERM_BP_FAT	cellular metal ion homeostasis	0.0372621
GO:0030004	GOTERM_BP_FAT	cellular monovalent inorganic cation homeostasis	0.0382494
GO:0030031	GOTERM_BP_FAT	cell projection assembly	0.0399241
GO:0006471	GOTERM_BP_FAT	protein amino acid ADP-ribosylation	0.0425188
GO:0006006	GOTERM_BP_FAT	glucose metabolic process	0.0435105
GO:0009615	GOTERM_BP_FAT	response to virus	0.0435608
GO:0001816	GOTERM_BP_FAT	cytokine production	0.0443042
GO:0006796	GOTERM_BP_FAT	phosphate metabolic process	0.0446055
GO:0006793	GOTERM_BP_FAT	phosphorus metabolic process	0.0446055
GO:0055065	GOTERM_BP_FAT	metal ion homeostasis	0.0459846
GO:0070566	GOTERM_MF_FAT	adenylyltransferase activity	0.0465856
GO:0042981	GOTERM_BP_FAT	regulation of apoptosis	0.0470431
GO:0051101	GOTERM_BP_FAT	regulation of DNA binding	0.0473779
GO:0007242	GOTERM_BP_FAT	intracellular signaling cascade	0.0480933
GO:0045765	GOTERM_BP_FAT	regulation of angiogenesis	0.0496136
																						0.044

## Sheet: Downreg
GO Term ID	Category	GO Term	PValue
GO:0006952	GOTERM_BP_FAT	defense response	5.78454e-10
GO:0005615	GOTERM_CC_FAT	extracellular space	5.90674e-10
GO:0044421	GOTERM_CC_FAT	extracellular region part	8.19029e-09
GO:0005886	GOTERM_CC_FAT	plasma membrane	1.10141e-08
GO:0009986	GOTERM_CC_FAT	cell surface	1.39833e-08
GO:0006955	GOTERM_BP_FAT	immune response	3.87107e-08
GO:0009897	GOTERM_CC_FAT	external side of plasma membrane	8.91435e-08
GO:0004866	GOTERM_MF_FAT	endopeptidase inhibitor activity	1.83754e-07
GO:0030414	GOTERM_MF_FAT	peptidase inhibitor activity	6.41543e-07
GO:0005576	GOTERM_CC_FAT	extracellular region	8.62538e-07
GO:0006954	GOTERM_BP_FAT	inflammatory response	1.04879e-06
GO:0004522	GOTERM_MF_FAT	pancreatic ribonuclease activity	1.71724e-06
GO:0016892	GOTERM_MF_FAT	endoribonuclease activity, producing 3'-phosphomonoesters	4.47912e-06
GO:0002526	GOTERM_BP_FAT	acute inflammatory response	6.72017e-06
GO:0030246	GOTERM_MF_FAT	carbohydrate binding	9.62493e-06
GO:0016894	GOTERM_MF_FAT	endonuclease activity, active with either ribo- or deoxyribonucleic acids and producing 3'-phosphomonoesters	1.00844e-05
GO:0004857	GOTERM_MF_FAT	enzyme inhibitor activity	1.14429e-05
GO:0009611	GOTERM_BP_FAT	response to wounding	1.21945e-05
GO:0019955	GOTERM_MF_FAT	cytokine binding	1.46724e-05
GO:0006935	GOTERM_BP_FAT	chemotaxis	1.72086e-05
GO:0042330	GOTERM_BP_FAT	taxis	1.72086e-05
GO:0002684	GOTERM_BP_FAT	positive regulation of immune system process	2.40276e-05
GO:0001775	GOTERM_BP_FAT	cell activation	5.38218e-05
GO:0050870	GOTERM_BP_FAT	positive regulation of T cell activation	5.68427e-05
GO:0001871	GOTERM_MF_FAT	pattern binding	7.70833e-05
GO:0030247	GOTERM_MF_FAT	polysaccharide binding	7.70833e-05
GO:0045087	GOTERM_BP_FAT	innate immune response	8.69604e-05
GO:0007626	GOTERM_BP_FAT	locomotory behavior	0.000118085
GO:0007155	GOTERM_BP_FAT	cell adhesion	0.000126189
GO:0022610	GOTERM_BP_FAT	biological adhesion	0.000126189
GO:0005539	GOTERM_MF_FAT	glycosaminoglycan binding	0.000137364
GO:0044459	GOTERM_CC_FAT	plasma membrane part	0.000144289
GO:0002696	GOTERM_BP_FAT	positive regulation of leukocyte activation	0.000162773
GO:0045619	GOTERM_BP_FAT	regulation of lymphocyte differentiation	0.0001663
GO:0050867	GOTERM_BP_FAT	positive regulation of cell activation	0.000191261
GO:0045321	GOTERM_BP_FAT	leukocyte activation	0.000192648
GO:0009967	GOTERM_BP_FAT	positive regulation of signal transduction	0.000235367
GO:0002694	GOTERM_BP_FAT	regulation of leukocyte activation	0.000285635
GO:0050865	GOTERM_BP_FAT	regulation of cell activation	0.000321032
GO:0008201	GOTERM_MF_FAT	heparin binding	0.000337432
GO:0005509	GOTERM_MF_FAT	calcium ion binding	0.000343533
GO:0008610	GOTERM_BP_FAT	lipid biosynthetic process	0.000355447
GO:0002697	GOTERM_BP_FAT	regulation of immune effector process	0.000358571
GO:0006953	GOTERM_BP_FAT	acute-phase response	0.000374517
GO:0004521	GOTERM_MF_FAT	endoribonuclease activity	0.000415695
GO:0045582	GOTERM_BP_FAT	positive regulation of T cell differentiation	0.000511302
GO:0010647	GOTERM_BP_FAT	positive regulation of cell communication	0.000540573
GO:0051251	GOTERM_BP_FAT	positive regulation of lymphocyte activation	0.000620694
GO:0045621	GOTERM_BP_FAT	positive regulation of lymphocyte differentiation	0.000682589
GO:0004896	GOTERM_MF_FAT	cytokine receptor activity	0.000976141
GO:0004869	GOTERM_MF_FAT	cysteine-type endopeptidase inhibitor activity	0.00124535
GO:0002252	GOTERM_BP_FAT	immune effector process	0.00132722
GO:0008236	GOTERM_MF_FAT	serine-type peptidase activity	0.00150547
GO:0017171	GOTERM_MF_FAT	serine hydrolase activity	0.0015777
GO:0050863	GOTERM_BP_FAT	regulation of T cell activation	0.00170226
GO:0046635	GOTERM_BP_FAT	positive regulation of alpha-beta T cell activation	0.0017352
GO:0051240	GOTERM_BP_FAT	positive regulation of multicellular organismal process	0.00175815
GO:0050900	GOTERM_BP_FAT	leukocyte migration	0.0018189
GO:0030005	GOTERM_BP_FAT	cellular di-, tri-valent inorganic cation homeostasis	0.00193851
GO:0004540	GOTERM_MF_FAT	ribonuclease activity	0.00199075
GO:0046649	GOTERM_BP_FAT	lymphocyte activation	0.00218614
GO:0004867	GOTERM_MF_FAT	serine-type endopeptidase inhibitor activity	0.00228743
GO:0030595	GOTERM_BP_FAT	leukocyte chemotaxis	0.00232894
GO:0060326	GOTERM_BP_FAT	cell chemotaxis	0.00232894
GO:0048870	GOTERM_BP_FAT	cell motility	0.00257153
GO:0051674	GOTERM_BP_FAT	localization of cell	0.00257153
GO:0051249	GOTERM_BP_FAT	regulation of lymphocyte activation	0.00262531
GO:0045580	GOTERM_BP_FAT	regulation of T cell differentiation	0.00301088
GO:0055066	GOTERM_BP_FAT	di-, tri-valent inorganic cation homeostasis	0.00349223
GO:0007610	GOTERM_BP_FAT	behavior	0.00349771
GO:0050848	GOTERM_BP_FAT	regulation of calcium-mediated signaling	0.00351176
GO:0006869	GOTERM_BP_FAT	lipid transport	0.00353363
GO:0016337	GOTERM_BP_FAT	cell-cell adhesion	0.0040068
GO:0045597	GOTERM_BP_FAT	positive regulation of cell differentiation	0.00405727
GO:0004519	GOTERM_MF_FAT	endonuclease activity	0.00446296
GO:0045860	GOTERM_BP_FAT	positive regulation of protein kinase activity	0.00454729
GO:0030003	GOTERM_BP_FAT	cellular cation homeostasis	0.0045698
GO:0016477	GOTERM_BP_FAT	cell migration	0.00458728
GO:0046634	GOTERM_BP_FAT	regulation of alpha-beta T cell activation	0.00491821
GO:0009617	GOTERM_BP_FAT	response to bacterium	0.00498135
GO:0048584	GOTERM_BP_FAT	positive regulation of response to stimulus	0.00514006
GO:0031224	GOTERM_CC_FAT	intrinsic to membrane	0.00520472
GO:0055080	GOTERM_BP_FAT	cation homeostasis	0.00533976
GO:0010876	GOTERM_BP_FAT	lipid localization	0.00550815
GO:0050727	GOTERM_BP_FAT	regulation of inflammatory response	0.00550878
GO:0042113	GOTERM_BP_FAT	B cell activation	0.00569164
GO:0004252	GOTERM_MF_FAT	serine-type endopeptidase activity	0.00576776
GO:0051094	GOTERM_BP_FAT	positive regulation of developmental process	0.00584284
GO:0045859	GOTERM_BP_FAT	regulation of protein kinase activity	0.00598049
GO:0033674	GOTERM_BP_FAT	positive regulation of kinase activity	0.00604313
GO:0050778	GOTERM_BP_FAT	positive regulation of immune response	0.00661674
GO:0006633	GOTERM_BP_FAT	fatty acid biosynthetic process	0.00684669
GO:0031226	GOTERM_CC_FAT	intrinsic to plasma membrane	0.00715597
GO:0043549	GOTERM_BP_FAT	regulation of kinase activity	0.00743326
GO:0051347	GOTERM_BP_FAT	positive regulation of transferase activity	0.00755331
GO:0007169	GOTERM_BP_FAT	transmembrane receptor protein tyrosine kinase signaling pathway	0.00769938
GO:0042325	GOTERM_BP_FAT	regulation of phosphorylation	0.00808022
GO:0019966	GOTERM_MF_FAT	interleukin-1 binding	0.00855164
GO:0004908	GOTERM_MF_FAT	interleukin-1 receptor activity	0.00855164
GO:0019899	GOTERM_MF_FAT	enzyme binding	0.00891503
GO:0050729	GOTERM_BP_FAT	positive regulation of inflammatory response	0.00935024
GO:0051338	GOTERM_BP_FAT	regulation of transferase activity	0.00949637
GO:0006928	GOTERM_BP_FAT	cell motion	0.010009
GO:0050830	GOTERM_BP_FAT	defense response to Gram-positive bacterium	0.0106601
GO:0002699	GOTERM_BP_FAT	positive regulation of immune effector process	0.0106735
GO:0019220	GOTERM_BP_FAT	regulation of phosphate metabolic process	0.0108558
GO:0051174	GOTERM_BP_FAT	regulation of phosphorus metabolic process	0.0108558
GO:0031295	GOTERM_BP_FAT	T cell costimulation	0.0114394
GO:0031294	GOTERM_BP_FAT	lymphocyte costimulation	0.0114394
GO:0045059	GOTERM_BP_FAT	positive thymic T cell selection	0.0114394
GO:0031012	GOTERM_CC_FAT	extracellular matrix	0.0115806
GO:0002703	GOTERM_BP_FAT	regulation of leukocyte mediated immunity	0.0119374
GO:0004518	GOTERM_MF_FAT	nuclease activity	0.0126473
GO:0001818	GOTERM_BP_FAT	negative regulation of cytokine production	0.0135834
GO:0045088	GOTERM_BP_FAT	regulation of innate immune response	0.0136228
GO:0000041	GOTERM_BP_FAT	transition metal ion transport	0.0143202
GO:0046641	GOTERM_BP_FAT	positive regulation of alpha-beta T cell proliferation	0.0145044
GO:0045060	GOTERM_BP_FAT	negative thymic T cell selection	0.0145044
GO:0030183	GOTERM_BP_FAT	B cell differentiation	0.0147097
GO:0016021	GOTERM_CC_FAT	integral to membrane	0.0151698
GO:0040018	GOTERM_BP_FAT	positive regulation of multicellular organism growth	0.0151991
GO:0010627	GOTERM_BP_FAT	regulation of protein kinase cascade	0.0154035
GO:0008283	GOTERM_BP_FAT	cell proliferation	0.0160446
GO:0016323	GOTERM_CC_FAT	basolateral plasma membrane	0.0161166
GO:0001608	GOTERM_MF_FAT	nucleotide receptor activity, G-protein coupled	0.0165227
GO:0045028	GOTERM_MF_FAT	purinergic nucleotide receptor activity, G-protein coupled	0.0165227
GO:0030097	GOTERM_BP_FAT	hemopoiesis	0.0169267
GO:0002237	GOTERM_BP_FAT	response to molecule of bacterial origin	0.0170443
GO:0003779	GOTERM_MF_FAT	actin binding	0.0173059
GO:0019838	GOTERM_MF_FAT	growth factor binding	0.0173516
GO:0043394	GOTERM_MF_FAT	proteoglycan binding	0.0175814
GO:0043395	GOTERM_MF_FAT	heparan sulfate proteoglycan binding	0.0175814
GO:0043383	GOTERM_BP_FAT	negative T cell selection	0.0178801
GO:0043368	GOTERM_BP_FAT	positive T cell selection	0.0178801
GO:0005887	GOTERM_CC_FAT	integral to plasma membrane	0.0179867
GO:0032101	GOTERM_BP_FAT	regulation of response to external stimulus	0.0192089
GO:0001614	GOTERM_MF_FAT	purinergic nucleotide receptor activity	0.0201925
GO:0016502	GOTERM_MF_FAT	nucleotide receptor activity	0.0201925
GO:0042098	GOTERM_BP_FAT	T cell proliferation	0.0206706
GO:0031225	GOTERM_CC_FAT	anchored to membrane	0.0207104
GO:0007160	GOTERM_BP_FAT	cell-matrix adhesion	0.0209586
GO:0007229	GOTERM_BP_FAT	integrin-mediated signaling pathway	0.0210714
GO:0043498	GOTERM_MF_FAT	cell surface binding	0.0211948
GO:0002275	GOTERM_BP_FAT	myeloid cell activation during immune response	0.0215522
GO:0042742	GOTERM_BP_FAT	defense response to bacterium	0.0228237
GO:0032993	GOTERM_CC_FAT	protein-DNA complex	0.0234995
GO:0031349	GOTERM_BP_FAT	positive regulation of defense response	0.0238501
GO:0006022	GOTERM_BP_FAT	aminoglycan metabolic process	0.0238501
GO:0002366	GOTERM_BP_FAT	leukocyte activation during immune response	0.0248419
GO:0002263	GOTERM_BP_FAT	cell activation during immune response	0.0248419
GO:0006959	GOTERM_BP_FAT	humoral immune response	0.025382
GO:0045055	GOTERM_BP_FAT	regulated secretory pathway	0.0255067
GO:0006826	GOTERM_BP_FAT	iron ion transport	0.0270848
GO:0019221	GOTERM_BP_FAT	cytokine-mediated signaling pathway	0.02862
GO:0044093	GOTERM_BP_FAT	positive regulation of molecular function	0.0286724
GO:0004175	GOTERM_MF_FAT	endopeptidase activity	0.028729
GO:0002521	GOTERM_BP_FAT	leukocyte differentiation	0.0290524
GO:0016053	GOTERM_BP_FAT	organic acid biosynthetic process	0.0290524
GO:0046394	GOTERM_BP_FAT	carboxylic acid biosynthetic process	0.0290524
GO:0004714	GOTERM_MF_FAT	transmembrane receptor protein tyrosine kinase activity	0.0294801
GO:0002886	GOTERM_BP_FAT	regulation of myeloid leukocyte mediated immunity	0.0297302
GO:0046640	GOTERM_BP_FAT	regulation of alpha-beta T cell proliferation	0.0297302
GO:0050850	GOTERM_BP_FAT	positive regulation of calcium-mediated signaling	0.0297302
GO:0007159	GOTERM_BP_FAT	leukocyte adhesion	0.0297302
GO:0015908	GOTERM_BP_FAT	fatty acid transport	0.0297302
GO:0007167	GOTERM_BP_FAT	enzyme linked receptor protein signaling pathway	0.030701
GO:0043405	GOTERM_BP_FAT	regulation of MAP kinase activity	0.0309947
GO:0030098	GOTERM_BP_FAT	lymphocyte differentiation	0.0313667
GO:0031589	GOTERM_BP_FAT	cell-substrate adhesion	0.0320926
GO:0019900	GOTERM_MF_FAT	kinase binding	0.0327683
GO:0005529	GOTERM_MF_FAT	sugar binding	0.0327914
GO:0005507	GOTERM_MF_FAT	copper ion binding	0.0329799
GO:0048534	GOTERM_BP_FAT	hemopoietic or lymphoid organ development	0.0335997
GO:0002253	GOTERM_BP_FAT	activation of immune response	0.0338643
GO:0043406	GOTERM_BP_FAT	positive regulation of MAP kinase activity	0.0339175
GO:0055085	GOTERM_BP_FAT	transmembrane transport	0.0339889
GO:0001655	GOTERM_BP_FAT	urogenital system development	0.0342228
GO:0042110	GOTERM_BP_FAT	T cell activation	0.0350434
GO:0010740	GOTERM_BP_FAT	positive regulation of protein kinase cascade	0.0368936
GO:0002443	GOTERM_BP_FAT	leukocyte mediated immunity	0.0384688
GO:0045577	GOTERM_BP_FAT	regulation of B cell differentiation	0.0389323
GO:0051057	GOTERM_BP_FAT	positive regulation of small GTPase mediated signal transduction	0.0389323
GO:0045061	GOTERM_BP_FAT	thymic T cell selection	0.0389323
GO:0005578	GOTERM_CC_FAT	proteinaceous extracellular matrix	0.0395807
GO:0007204	GOTERM_BP_FAT	elevation of cytosolic calcium ion concentration	0.0398558
GO:0032103	GOTERM_BP_FAT	positive regulation of response to external stimulus	0.0398558
GO:0050855	GOTERM_BP_FAT	regulation of B cell receptor signaling pathway	0.0417911
GO:0030335	GOTERM_BP_FAT	positive regulation of cell migration	0.0427167
GO:0002673	GOTERM_BP_FAT	regulation of acute inflammatory response	0.0438862
GO:0000786	GOTERM_CC_FAT	nucleosome	0.0440097
GO:0010324	GOTERM_BP_FAT	membrane invagination	0.0440519
GO:0006897	GOTERM_BP_FAT	endocytosis	0.0440519
GO:0043408	GOTERM_BP_FAT	regulation of MAPKKK cascade	0.0451765
GO:0005976	GOTERM_BP_FAT	polysaccharide metabolic process	0.0451765
GO:0002520	GOTERM_BP_FAT	immune system development	0.045211
GO:0051480	GOTERM_BP_FAT	cytosolic calcium ion homeostasis	0.0456777
GO:0065003	GOTERM_BP_FAT	macromolecular complex assembly	0.0482034
GO:0019903	GOTERM_MF_FAT	protein phosphatase binding	0.0482816
GO:0048585	GOTERM_BP_FAT	negative regulation of response to stimulus	0.0483563
GO:0030574	GOTERM_BP_FAT	collagen catabolic process	0.0490594
GO:0030593	GOTERM_BP_FAT	neutrophil chemotaxis	0.0490594
GO:0043085	GOTERM_BP_FAT	positive regulation of catalytic activity	0.0497926
