# Supplementary material for: miR-142 orchestrates a network of actin cytoskeleton regulators during megakaryopoiesis
Source: eLife. 2014 May 23;3:e01964. doi: 10.7554/eLife.01964 (PMC4067751; doi:10.7554/eLife.01964)
Supplement: Figure 5—source data 2. — TargetScan predicted targets of miR-142-3p miR-142-5p are indicated. DOI: http://dx.doi.org/10.7554/eLife.01964.014 [file elife01964s003.xlsx]

## Sheet: Sheet1
	Gene name	Fold Ratio (KO/WT)			TargetScan (conserved)
		MK	DC (CD24+)	DC (CD24–)	miR–142-3p	miR-142-5p
	Eya1	6.95	7.53	12.18
	Cfl2	4.32	2.43	2.53	Yes
	Gna11	3.64	2.23	2.63
	Lpp	3.17	1.92	1.82
	Wipi1	2.89	1.69	2.35
	Atp2b4	2.79	1.77	3.26
	Tsen34	2.74	2.35	2.33	Yes
	Itgav	2.59	1.65	1.93	Yes
	C78339	2.53	1.71	1.82
	Rab12	2.5	1.99	2.17
	Wasl	2.46	2.01	1.72	Yes
	Cd151	2.24	2.58	2.57
	Aldh6a1	2.22	2.19	1.58
	Crtap	2.19	1.92	2
	Calcrl	2.18	1.51	1.51
	Rnf43	2.17	8.93	8.55
	Capg	2.1	1.5	1.55
	Scoc	2.09	2.07	1.78		Yes
	Pltp	2.04	1.52	2.35
	Grlf1	2.02	2.26	2.03	Yes	Yes
	2900026A02Rik	2.01	1.58	1.88
	Twf1	1.89	1.71	1.63	Yes
	Hoxa9	1.88	6.79	8.26
	Bod1	1.85	1.77	1.91	Yes
	Tspan9	1.83	1.54	1.89
	Hip1	1.82	1.83	2.06	Yes
	Akt1s1	1.81	1.7	1.61	Yes
	Tanc2	1.8	2.02	2.79
	Dcakd	1.75	2.17	2.04
	Lrrc68	1.71	1.58	1.68	Yes
	Inpp5a	1.71	1.89	1.67	Yes
	4931406C07Rik	1.7	1.8	1.78
	Cdk16	1.68	1.54	1.66
	Sik1	1.65	1.57	1.84	Yes
	Thbd	1.64	1.65	1.5
	Alg14	1.57	1.7	1.67
	Golm1	1.55	1.68	2.14
	Fam171a2	1.54	2.11	1.88
	Pam	1.51	2.01	1.57
