# Supplementary material for: miR-142 orchestrates a network of actin cytoskeleton regulators during megakaryopoiesis
Source: eLife. 2014 May 23;3:e01964. doi: 10.7554/eLife.01964 (PMC4067751; doi:10.7554/eLife.01964)
Supplement: Supplementary file 1. — Sequences of primers used in this study. DOI: http://dx.doi.org/10.7554/eLife.01964.022 [file elife01964s004.xlsx]

## Sheet: Sheet1
		Gene	Forward	Reverse
		miR-142-3p	TGTAGTGTTTCCTACTTTATGGA	––
		miR-142-5p	CATAAAGTAGAAAGCACTACT	––
		RNU6B (U6)	GATGACACGCAAATTCGTGAA	––
		Cfl2	TCTCGTCCCAGTGCCACCGA	ACTCCAGATGCCATAGTGCCCGC
		Wasl	CCTGCTGCTCACCCCGCAAG	ACCAGACAAGCGACACCACTGC
		Itgav	CTCGGCAGGTGGTGTGCGAC	TGCTGGTGCACGCTGAAACGA
		Grlf1	TGCATGCTCTGAAGGAAGTG	AGAAGCAGATGGACAGGTTCTC
		Bod1	AGCGTGGTTCAGTCAGGTATG	TCTGTGGCCTGAAGATGTGG
		Twf1	ATTTGCTGTCCCAGTCTTCC	TACGCCTTGGAGTGTCTGGT
		Hprt	CTGGTTAAGCAGTACAGCCCCAAA	TGGCCTGTATCCAACACTTCGAGA
		Gata1	TCACAAGATGAATGGTCAGA	TGGTCGTTTGACAGTTAGTG
		Gata2	CACCCCTATCCCGTGAATCC	GGCGGCCACTCGCAG
		Zfpm1	GTCCAGGAGGAAACAGAGCA	CTTGGGGCTGCTGTCCAT
		Klf1	CCTCCATCAGTACACTCACC	CCTCCGATTTCAGACTCACG
		Fli1	AACCGGGTCAATGTGTGGAA	ACCACAGACAGAGCCTCCTTA
		Spi1	GCTTGGACGAGAACTGGAAG	GAGAAGCTGATGGCTTGGAG
		Runx1	GCAGGCAACGATGAAAACTACT	GCAACTTGTGGCGGATTTGTA
		Tal1	GTTTCGCCTATTTCTGACCGC	TTAGGACCTCCACTCCTCCG
